# Supplementary material for: Transcriptional Analysis of Nuclear-Encoded Mitochondrial Genes in Eight Neurodegenerative Disorders: The Analysis of Seven Diseases in Reference to Friedreich’s Ataxia
Source: Front Genet. 2021 Dec 20;12:749792. doi: 10.3389/fgene.2021.749792 (PMC8721009; doi:10.3389/fgene.2021.749792)
Supplement: Supplementary file 5 [file Table11.XLSX]

## Sheet: Table S11genes involved in the 
ubiquioniol biosynthesis	trna_modification	TP53	respiratory_electron	protien_import	peroximal	NrPL3	mitcondrial_elongation	mitcondrial_initiation	mitcondrial_termination	glyxolyate	detoxification	branchedchain	citric_acid	Beta_oxidation
COQ2	TRMU	PTEN	COQ10A	TIMM8A	PEX5	P2RX7	MRPL41	MTFMT	MRPL41	HOGA1	CAT	AUH	MDH2	ACADM
CL640	MTU1	MMAC1	UNQ6192/PRO20219	DDP	PXR1	PANX1	BMRP	FMT	BMRP	C10orf65	GPX1	HIBCH	ME2	MECR
COQ3	TRMT1	TEP1	COQ10B	DDP1	PEX7	MRS1	MRPL27	FMT1	MRPL27	DHDPSL	SOD3	BCAT1	FH	NBRF1
UG0215E05	TRMT10C	TP53	NDUFS5	TIM8A	PTS2R	UNQ2529/PRO6028	RPML27	MTIF3	RPML27	HAO1	SOD1	BCT1	OGDH	CGI-63
COQ9	MRPP1	P53	NDUFS6	TIMM13	AGPS	CASP1	PIG3	DC38	PIG3	GOX1	CCS	ECA39	DLST	ECHS1
C16orf49	RG9MTD1	TIGAR	NDUFV1	TIM13B	AAG5	IL1BC	MT-TV	DAP3	MT-TV	HAOX1	NCF4	HIBADH	DLTS	HADHA
HSPC326	PRORP	C12orf5	UQOR1	TIMM13A	ACAA1	IL1BCE	MRPL21	MRPS29	MRPL21	PRODH2	SH3PXD4	BCAT2	DLD	HADH
PSEC0129	KIAA0391	PRKAA1	NDUFV3	TIMM13B	ACAA	NLRP3	MRPL53	MRPS18A	MRPL53	HSPOX1	NCF1	BCATM	GCSL	HADHB
COQ7	MRPP3	AMPK1	NDUFA12	TIMM8B	PTHIO	C1orf7	MRPL39	MRPS18B	MRPL39	HYPDH	NOXO2	BCT2	LAD	MSTP029
COQ6	HSD17B10	PRKAA2	DAP13	DDP2	PHYH	CIAS1	C21orf92	C6orf14	C21orf92	GRHPR	SH3PXD1A	ECA40	PHE3	HADH
CGI-10	ERAB	AMPK	NDUFS4	DDPL	PAHX	NALP3	MRPL5	HSPC183	MRPL5	GLXR	NCF2	BCKDK	IDH2	HAD
COQ5	HADH2	AMPK2	NDUFS1	TIM8B	PEX10	PYPAF1	RPML5	PTD017	RPML5	MSTP035	NOXA2	DBT	SDHA	HAD1
PDSS1	MRPP2	PRKAB1	NDUFV2	TOMM40	RNF69	APP	MSTP003	MRPS18C	MSTP003	ALDH4A1	P67PHOX	BCATE2	SDH2	HADHSC
DPS1	SCHAD	AMPK	MT-ND4	C19orf1	PEX2	A4	PRED22	CGI-134	PRED22	ALDH4	CYBA	BCKDHB	SDHF	SCHAD
TPRT	SDR5C1	PRKAB2	MTND4	PEREC1	PAF1	AD1	MRPL57	MRPS11	MRPL57	P5CDH	CYBB	BCKDHA	SDHB	ACADM
PDSS2	XH98G2	PRKAG2	NADH4	TOM40	PMP3	hly	MRP63	RPMS11	MRP63	GNMT	NOX2	DLD	SDH	MECR
C6orf210	TRMT61B	PRKAG1	ND4	SLC25A12	PMP35	hla	MRPL45	HCC2	MRPL45	AGXT2	GSR	GCSL	SDH1	NBRF1
DLP1	TRIT1	PRKAG3	MT-ND5	ARALAR1	PXMP3	SUGT1	MRPL55	MRPS15	MRPL55	AGT2	GLUR	LAD	SDHD	CGI-63
COQ2	IPT	AMPKG3	MTND5	SLC25A13	RNF72	HSP90AB1	UNQ5835/PRO19675	RPMS15	UNQ5835/PRO19675	GOT2	GRD1	PHE3	SDH4	ECHS1
CL640	MOD5	TSC1	NADH5	ARALAR2	PEX12	HSP90B	GADD45GIP1	DC37	GADD45GIP1	KYAT4	TXNRD1	ACAD8	SDHC	HADHA
COQ3	PUS1	KIAA0243	ND5	TIMM23	PAF3	HSPC2	MRPL59	MRPS33	MRPL59	LIAS	GRIM12	ARC42	CYB560	HADH
UG0215E05	PP8985	TSC	MT-ND1	TIM23	PEX13	HSPCB	PLINP1	CGI-139	PLINP1	LAS	KDRF	IBD	SDH3	HADHB
COQ9	MTO1	TSC2	MTND1	PITRM1	PEX14	PYCARD	PRG6	PTD003	PRG6	HUSSY-01	TXN	ALDH6A1	SUCLA2	MSTP029
C16orf49	CGI-02	TSC4	NADH1	KIAA1104	UBC	ASC	MRPL36	PTCD3	MRPL36	GCSH	TRDX	MMSDH	SUCLG1	HADH
HSPC326	GTPBP3	DDIT4	ND1	MP1	UBB	CARD5	BRIP1	MRPS39	BRIP1	AGXT	TRX	SLC25A44	ME3	HAD
PSEC0129	MTGP1	REDD1	NDUFA9	PREP	UBA52	TMS1	MRPL11	TRG15	MRPL11	AGT1	TRX1	KIAA0446	IDH3B	HAD1
COQ7	TRMU	RTP801	NDUFS2L	COQ2	UBCEP2	TXN	CGI-113	MRPS16	CGI-113	SPAT	GPX2	ACADSB	IDH3A	HADHSC
COQ6	MTU1	YWHAQ	NDUFS3	CL640	RPS27A	TRDX	MRPL28	RPMS16	MRPL28	LIPT2	PRDX5	MCCC2	IDH3G	SCHAD
CGI-10	TRMT1	YWHAH	NDUFS8	ATP5F1B	UBA80	TRX	MAAT1	CGI-132	MAAT1	NDUFAB1	ACR1	MCCB	ACO2	ACADM
COQ5	TRMT10C	YWHA1	NDUFS7	ATP5B	UBCEP1	TRX1	MRPL46	MRPS2	MRPL46	DLD	SBBI10	MCCC1	FAHD1	MECR
PDSS1	MRPP1	YWHAG	NDUFS2	ATPMB	PEX5	TXNIP	C15orf4	CGI-91	C15orf4	GCSL	PRDX1	MCCA	C16orf36	NBRF1
DPS1	RG9MTD1	YWHAB	NDUFB8	ATPSB	PXR1	VDUP1	LIECG2	MRPS12	LIECG2	LAD	PAGA	HSD17B10	YISKL	CGI-63
TPRT	PRORP	YWHAZ	NDUFA13	ATP5MC1	USP9X	NLRP3	MRPL13	RPMS12	MRPL13	PHE3	PAGB	ERAB	NNT	ECHS1
PDSS2	KIAA0391	SFN	GRIM19	ATP5G1	DFFRX	C1orf7	MRPL44	RPSM12	MRPL44	GLDC	TDPX2	HADH2	CS	HADHA
C6orf210	MRPP3	HME1	CDA016	LDHD	FAM	CIAS1	MRPL3	MRPS6	MRPL3	GCSP	PRDX2	MRPP2	SUCLG2	HADH
DLP1	HSD17B10	YWHAE	CGI-39	NDUFB8	USP9	NALP3	MRL3	C21orf101	MRL3	AMT	NKEFB	SCHAD	MDH2	HADHB
COQ2	ERAB	RPTOR	NDUFB10	HSCB	UBE2D2	PYPAF1	RPML3	RPMS6	RPML3	GCST	TDPX1	SDR5C1	ME2	MSTP029
CL640	HADH2	KIAA1303	NDUFB7	DNAJC20	PUBC1	NFKB1	MRPL20	MRPS10	MRPL20	DAO	GPX6	XH98G2	FH	HADH
COQ3	MRPP2	RAPTOR	NDUFA10	HSC20	UBC4	NFKB2	MRPL37	MSTP040	MRPL37	DAMOX	GPX5	PPM1K	OGDH	HAD
UG0215E05	SCHAD	MTOR	NDUFC1	HSPD1	UBC5B	LYT10	MRPL2	MRPS7	MRPL2	DDO	GSTP1	PP2CM	DLST	HAD1
COQ9	SDR5C1	FRAP	NDUFB2	HSP60	UBCH4	RELA	RPML2	MRPS34	RPML2	LIPT1	FAEES3	ECHS1	DLTS	HADHSC
C16orf49	XH98G2	FRAP1	NDUFB5	FXN	UBCH5B	NFKB3	HSPC235	MRPS35	HSPC235	BCKDHB	GST3	IVD	DLD	SCHAD
HSPC326	TRMT61B	FRAP2	NDUFB9	FRDA	UBE2D1	HMOX1	MRPL18	MRPS28	MRPL18	BCKDHA	PRDX6	ACAT1	GCSL	ACADM
PSEC0129	TRIT1	RAFT1	LYRM3	X25	SFT	HO	HSPC071	HDCMD11P	HSPC071	DBT	AOP2	ACAT	LAD	MECR
COQ7	IPT	RAPT1	UQOR22	OTC	UBC5A	HO1	MRPL34	MDS023	MRPL34	BCATE2	KIAA0106	MAT	PHE3	NBRF1
COQ6	MOD5	MLST8	NDUFA11	TIMM50	UBCH5	PSTPIP1	MRPL38	PSEC0213	MRPL38	DLST	GPX3	AUH	IDH2	CGI-63
CGI-10	PUS1	GBL	NDUFA2	TIM50	UBCH5A	CD2BP1	HSPC262	MRPS23	HSPC262	DLTS	GPXP	HIBCH	SDHA	ECHS1
COQ5	PP8985	LST8	NDUFA7	PRO1512	UBE2D3	MEFV	MRPL1	CGI-138	MRPL1	OGDH	NOX4	BCAT1	SDH2	HADHA
PDSS1	MTO1	SLC38A9	NDUFA8	GRPEL1	UBC5C	MEF	BM-022	HSPC329	BM-022	DHTKD1	RENOX	BCT1	SDHF	HADH
DPS1	CGI-02	URLC11	NDUFA1	GREPEL1	UBCH5C	TRIM20	OXA1L	MRPS5	OXA1L	KIAA1630	NOX5	ECA39	SDHB	HADHB
TPRT	GTPBP3	LAMTOR5	NDUFA3	GRPEL2	CAT	P2RX7	MRPL32	MRPS17	MRPL32	PDHB	PRDX5	HIBADH	SDH	MSTP029
PDSS2	MTGP1	HBXIP	NDUFC2	TIMM44	TYSND1	PANX1	HSPC283	RPMS17	HSPC283	PHE1B	ACR1	BCAT2	SDH1	HADH
C6orf210	TRMU	XIP	HLC1	MIMT44	PIPOX	MRS1	MRPL15	HSPC011	MRPL15	PDHA2	SBBI10	BCATM	SDHD	HAD
DLP1	MTU1	LAMTOR1	NDUFB1	TIM44	LPIPOX	UNQ2529/PRO6028	HSPC145	MRPS36	HSPC145	PDHAL	TXN2	BCT2	SDH4	HAD1
COQ2	TRMT1	C11orf59	NDUFAB1	DNAJC19	PSO	CASP1	MRPL40	KGD4	MRPL40	PDHA1	TRX2	ECA40	SDHC	HADHSC
CL640	TRMT10C	PDRO	NDUFA5	TIM14	NOS2	IL1BC	NLVCF	DC47	NLVCF	PHE1A	CYCS	BCKDK	CYB560	SCHAD
COQ3	MRPP1	PP7157	NDUFB3	TIMM14	NOS2A	IL1BCE	URIM	MRPS25	URIM	PDHX	CYC	DBT	SDH3	ACADM
UG0215E05	RG9MTD1	LAMTOR2	NDUFA6	PAM16	ACOT2	NLRP3	MRPL14	RPMS25	MRPL14	PDX1	TXNRD2	BCATE2	SUCLA2	MECR
COQ9	PRORP	MAPBPIP	LYRM6	MAGMAS	PTE2	C1orf7	MRPL32	MT-RNR1	MRPL32	DLAT	KIAA1652	BCKDHB	SUCLG1	NBRF1
C16orf49	KIAA0391	ROBLD3	NADHB14	TIM16	PTE2A	CIAS1	RPML32	AURKAIP1	RPML32	DLTA	TRXR2	BCKDHA	ME3	CGI-63
HSPC326	MRPP3	HSPC003	NDUFB4	TIMM16	DAO	NALP3	MRPL16	AIP	MRPL16	PXMP2	ATP7A	DLD	IDH3B	ECHS1
PSEC0129	HSD17B10	LAMTOR3	NDUFB11	CGI-136	DAMOX	PYPAF1	PNAS-111	AKIP	PNAS-111	PMP22	MC1	GCSL	IDH3A	HADHA
COQ7	ERAB	MAP2K1IP1	UNQ111/PRO1064	HSPA9	ACOX3	APP	MRPL17	MRPS38	MRPL17	HOGA1	MNK	LAD	IDH3G	HADH
COQ6	HADH2	MAPKSP1	COA1	GRP75	BRCOX	A4	LIP2	MRPS28	LIP2	C10orf65	ATOX1	PHE3	ACO2	HADHB
CGI-10	MRPP2	PRO2783	C7orf44	HSPA9B	PRCOX	AD1	MRPL19	MRPS35	MRPL19	DHDPSL	HAH1	ACAD8	FAHD1	MSTP029
COQ5	SCHAD	LAMTOR4	MITRAC15	mt-HSP70	ACOX2	hly	KIAA0104	HSPC007	KIAA0104	HAO1	NUDT2	ARC42	C16orf36	HADH
PDSS1	SDR5C1	C7orf59	MT-ND2	TIMM21	DECR2	hla	MRPL15	MRPS26	MRPL15	GOX1	APAH1	IBD	YISKL	HAD
DPS1	XH98G2	RRAGC	MTND2	C18orf55	PDCR	SUGT1	MRPL4	C20orf193	MRPL4	HAOX1	SOD2	ALDH6A1	NNT	HAD1
TPRT	TRMT61B	RRAGD	NADH2	TIM21	SDR17C1	HSP90AB1	CDABP0091	RPMS13	CDABP0091	PRODH2	AQP8	MMSDH	CS	HADHSC
PDSS2	TRIT1	RRAGA	ND2	HSPC154	ACOX1	HSP90B	CGI-28	MRPS31	CGI-28	HSPOX1	GSR	SLC25A44	SUCLG2	SCHAD
C6orf210	IPT	RRAGB	NDUFB6	TIMM17A	ACOX	HSPC2	MRPL22	IMOGN38	MRPL22	HYPDH	GLUR	KIAA0446	MDH2	ACADM
DLP1	MOD5	RHEB	MT-ND3	MIMT17	EHHADH	HSPCB	MRPL25	MRPS21	MRPL25	GRHPR	GRD1	ACADSB	ME2	MECR
COQ2	PUS1	RHEB2	MTND3	TIM17	ECHD	PYCARD	RPML25	RPMS21	RPML25	GLXR	ERO1A	MCCC2	FH	NBRF1
CL640	PP8985	TIGAR	NADH3	TIM17A	ACOT4	ASC	HSPC158	MDS016	HSPC158	MSTP035	ERO1L	MCCB	OGDH	CGI-63
COQ3	MTO1	C12orf5	ND3	TIMM17	PTE2B	CARD5	MRPL33	MRPS9	MRPL33	ALDH4A1	UNQ434/PRO865	MCCC1	DLST	ECHS1
UG0215E05	CGI-02	PTEN	TMEM186	TIMM17B	PTEIB	TMS1	C2orf1	RPMS9	C2orf1	ALDH4	GPX8	MCCA	DLTS	HADHA
COQ9	GTPBP3	TXNRD1	C16orf51	TIM17B	DHRS4	TXN	MRPL48	MRPS30	MRPL48	P5CDH	UNQ847/PRO1785	HSD17B10	DLD	HADH
C16orf49	MTGP1	GRIM12	MT-ND6	JM3	SDR25C2	TRDX	CGI-118	PDCD9	CGI-118	GNMT	GPX7	ERAB	GCSL	HADHB
HSPC326	TRMU	KDRF	MTND6	SAMM50	UNQ851/PRO1800	TRX	HSPC290	BM-047	HSPC290	AGXT2	GPX6	HADH2	LAD	MSTP029
PSEC0129	MTU1	TXN	NADH6	SAM50	HACL1	TRX1	MRPL2	MRPS22	MRPL2	AGT2	UNQ469/PRO828	MRPP2	PHE3	HADH
COQ7	TRMT1	TRDX	ND6	CGI-51	HPCL	TXNIP	CGI-22	C3orf5	CGI-22	GOT2	P4HB	SCHAD	IDH2	HAD
COQ6	TRMT10C	TRX	ETFDH	TRG3	HPCL2	VDUP1	MRPL51	RPMS22	MRPL51	KYAT4	ERBA2L	SDR5C1	SDHA	HAD1
CGI-10	MRPP1	TRX1	ETFB	MTX1	PHYH2	NLRP3	MRP64	GK002	MRP64	LIAS	PDI	XH98G2	SDH2	HADHSC
COQ5	RG9MTD1	GPX2	FP585	MTX	HSPC279	C1orf7	CDA09	MRPS14	CDA09	LAS	PDIA1	PPM1K	SDHF	SCHAD
PDSS1	PRORP	PRDX5	ETFA	MTXN	IDH1	CIAS1	HSPC241	ERAL1	HSPC241	HUSSY-01	PO4DB	PP2CM	SDHB	ACADM
DPS1	KIAA0391	ACR1	NDUFAF2	MTX2	PICD	NALP3	MRPL54	HERA	MRPL54	GCSH	PRDX3	ECHS1	SDH	MECR
TPRT	MRPP3	SBBI10	NDUFA12L	VDAC1	DDO	PYPAF1	MRPL27	MRPS27	MRPL27	AGXT	AOP1	IVD	SDH1	NBRF1
PDSS2	HSD17B10	PRDX1	NDUFAF7	VDAC	ACOT8	NFKB1	HSPC250	KIAA0264	HSPC250	AGT1	CAT	ACAT1	SDHD	CGI-63
C6orf210	ERAB	PAGA	C2orf56	TIMM9	ACTEIII	NFKB2	MRPL52	MRPS24	MRPL52	SPAT	GPX1	ACAT	SDH4	ECHS1
DLP1	HADH2	PAGB	PRO1853	TIM9	PTE1	LYT10	MRPL30	HSPC335	MRPL30	LIPT2	SOD3	MAT	SDHC	HADHA
COQ2	MRPP2	TDPX2	NDUFAF3	TIM9A	MPV17	RELA	MRPL28	CHCHD1	MRPL28	NDUFAB1	SOD1	AUH	CYB560	HADH
CL640	SCHAD	PRDX2	C3orf60	TIMM9A	IDE	NFKB3	RPML28	C10orf34	RPML28	DLD	CCS	HIBCH	SDH3	HADHB
COQ3	SDR5C1	NKEFB	NDUFAF4	TIMM10	SCP2	HMOX1	HSPC249	MRPS37	HSPC249	GCSL	NCF4	BCAT1	SUCLA2	MSTP029
UG0215E05	XH98G2	TDPX1	C6orf66	TIM10	BAAT	HO	MRPL10	MTIF2	MRPL10	LAD	SH3PXD4	BCT1	SUCLG1	HADH
COQ9	TRMT61B	SCO2	HRPAP20	SLC25A4	AGXT	HO1	MRPL8	MRPL41	MRPL8	PHE3	NCF1	ECA39	ME3	HAD
C16orf49	TRIT1	SCO2	HSPC125	AAC1	AGT1	PSTPIP1	RPML8	BMRP	RPML8	GLDC	NOXO2	HIBADH	IDH3B	HAD1
HSPC326	IPT	RRM2B	My013	ANT1	SPAT	CD2BP1	MRPL43	MRPL27	MRPL43	GCSP	SH3PXD1A	BCAT2	IDH3A	HADHSC
PSEC0129	MOD5	P53R2	TIMMDC1	TIMM22	GNPAT	MEFV	MRPL47	RPML27	MRPL47	AMT	NCF2	BCATM	IDH3G	SCHAD
COQ7	PUS1	RRM2B	C3orf1	TEX4	DAPAT	MEF	NCM1	PIG3	NCM1	GCST	NOXA2	BCT2	ACO2	ACADM
COQ6	PP8985	P53R2	UNQ247/PRO284	TIM22	DHAPAT	TRIM20	CGI-204	MT-TV	CGI-204	DAO	P67PHOX	ECA40	FAHD1	MECR
CGI-10	MTO1	G6PD	TMEM126B	TAZ	HAO1	P2RX7	MRPL50	MRPL21	MRPL50	DAMOX	CYBA	BCKDK	C16orf36	NBRF1
COQ5	CGI-02	TP63	HT007	EFE2	GOX1	PANX1	MRPL23	MRPL53	MRPL23	DDO	CYBB	DBT	YISKL	CGI-63
PDSS1	GTPBP3	KET	ECSIT	G4.5	HAOX1	MRS1	L23MRP	MRPL39	L23MRP	LIPT1	NOX2	BCATE2	NNT	ECHS1
DPS1	MTGP1	P63	NDUFAF1	SLC25A6	PAOX	UNQ2529/PRO6028	RPL23L	C21orf92	RPL23L	BCKDHB	GSR	BCKDHB	CS	HADHA
TPRT	TRMU	P73H	CIA30	AAC3	PAO	CASP1	MRPL24	MRPL5	MRPL24	BCKDHA	GLUR	BCKDHA	SUCLG2	HADH
PDSS2	MTU1	P73L	CGI-65	ANT3	UNQ1923/PRO4398	IL1BC	MRPL9	RPML5	MRPL9	DBT	GRD1	DLD	MDH2	HADHB
C6orf210	TRMT1	TP73L	ACAD9	CDABP0051	CROT	IL1BCE	MRPL49	MSTP003	MRPL49	BCATE2	TXNRD1	GCSL	ME2	MSTP029
DLP1	TRMT10C	DDIT4	NDUFAF5	TIMM10B	COT	NLRP3	C11orf4	PRED22	C11orf4	DLST	GRIM12	LAD	FH	HADH
COQ2	MRPP1	REDD1	C20orf7	FXC1	LONP2	C1orf7	NOF1	MRPL57	NOF1	DLTS	KDRF	PHE3	OGDH	HAD
CL640	RG9MTD1	RTP801	NDUFAF6	TIM9B	LONP	CIAS1	OK/SW-cl.67	MRP63	OK/SW-cl.67	OGDH	TXN	ACAD8	DLST	HAD1
COQ3	PRORP	SESN3	C8orf38	TIMM9B	NUDT7	NALP3	MRPL12	MRPL45	MRPL12	DHTKD1	TRDX	ARC42	DLTS	HADHSC
UG0215E05	KIAA0391	SEST3	NUBPL	GFER	HMGCL	PYPAF1	RPML12	MRPL55	RPML12	KIAA1630	TRX	IBD	DLD	SCHAD
COQ9	MRPP3	SESN1	C14orf127	ALR	AMACR	APP	MRPL7	UNQ5835/PRO19675	MRPL7	PDHB	TRX1	ALDH6A1	GCSL	ACADM
C16orf49	HSD17B10	PA26	UQCRFS1	HERV1	ECI2	A4	MT-RNR2	GADD45GIP1	MT-RNR2	PHE1B	GPX2	MMSDH	LAD	MECR
HSPC326	ERAB	SEST1	MT-CYB	HPO	DRS1	AD1	MRPL35	MRPL59	MRPL35	PDHA2	PRDX5	SLC25A44	PHE3	NBRF1
PSEC0129	HADH2	SESN2	COB	CHCHD4	HCA88	hly	BM-007	PLINP1	BM-007	PDHAL	ACR1	KIAA0446	IDH2	CGI-63
COQ7	MRPP2	Hi95	CYTB	MIA40	PECI	hla	MRPL58	PRG6	MRPL58	PDHA1	SBBI10	ACADSB	SDHA	ECHS1
COQ6	SCHAD	SEST2	MTCYB	CMC2	GSTK1	SUGT1	DS1	MRPL36	DS1	PHE1A	PRDX1	MCCC2	SDH2	HADHA
CGI-10	SDR5C1	PTEN	UQCR10	C16orf61	HDCMD47P	HSP90AB1	ICT1	BRIP1	ICT1	PDHX	PAGA	MCCB	SDHF	HADH
COQ5	XH98G2	MMAC1	UCRC	DC13	HAO2	HSP90B	MRPL42	MRPL11	MRPL42	PDX1	PAGB	MCCC1	SDHB	HADHB
PDSS1	TRMT61B	TEP1	HSPC119	COA6	HAOX2	HSPC2	MRPL31	CGI-113	MRPL31	DLAT	TDPX2	MCCA	SDH	MSTP029
DPS1	TRIT1	MIR26A2	UQCRQ	C1orf31	GIG16	HSPCB	MRPS32	MRPL28	MRPS32	DLTA	PRDX2	HSD17B10	SDH1	HADH
TPRT	IPT	MIR26A1	UQCRC2	CMC4	SLC27A2	PYCARD	RPML31	MAAT1	RPML31	PXMP2	NKEFB	ERAB	SDHD	HAD
PDSS2	MOD5	AGO3	CYC1	C6.1B	ACSVL1	ASC	HSPC204	MRPL46	HSPC204	PMP22	TDPX1	HADH2	SDH4	HAD1
C6orf210	PUS1	EIF2C3	UQCRH	MTCP1	FACVL1	CARD5	PTD007	C15orf4	PTD007	HOGA1	GPX6	MRPP2	SDHC	HADHSC
DLP1	PP8985	AGO4	UQCRB	MTCP1NB	FATP2	TMS1	DAP3	LIECG2	DAP3	C10orf65	GPX5	SCHAD	CYB560	SCHAD
COQ2	MTO1	EIF2C4	UQBP	COA4	VLACS	TXN	MRPS29	MRPL13	MRPS29	DHDPSL	GSTP1	SDR5C1	SDH3	ACADM
CL640	CGI-02	KIAA1567	UQCRC1	CHCHD8	PECR	TRDX	MRPS18A	MRPL44	MRPS18A	HAO1	FAEES3	XH98G2	SUCLA2	MECR
COQ3	GTPBP3	AGO1	UQCR11	E2IG2	SDR29C1	TRX	MRPS18B	MRPL3	MRPS18B	GOX1	GST3	PPM1K	SUCLG1	NBRF1
UG0215E05	MTGP1	EIF2C1	UQCR	CHCHD7	PRO1004	TRX1	C6orf14	MRL3	C6orf14	HAOX1	PRDX6	PP2CM	ME3	CGI-63
COQ9	TRMU	TNRC6A	CYCS	COX17	ECH1	TXNIP	HSPC183	RPML3	HSPC183	PRODH2	AOP2	ECHS1	IDH3B	ECHS1
C16orf49	MTU1	CAGH26	CYC	COX19	MLYCD	VDUP1	PTD017	MRPL20	PTD017	HSPOX1	KIAA0106	IVD	IDH3A	HADHA
HSPC326	TRMT1	KIAA1460	COX6C	CHCHD5	HSD17B4	NLRP3	MRPS18C	MRPL37	MRPS18C	HYPDH	GPX3	ACAT1	IDH3G	HADH
PSEC0129	TRMT10C	TNRC6	COX6B1	C2orf9	EDH17B4	C1orf7	CGI-134	MRPL2	CGI-134	GRHPR	GPXP	ACAT	ACO2	HADHB
COQ7	MRPP1	TNRC6B	COX6B	CHCHD2	SDR8C1	CIAS1	MRPS11	RPML2	MRPS11	GLXR	NOX4	MAT	FAHD1	MSTP029
COQ6	RG9MTD1	KIAA1093	NDUFA4	C7orf17	NUDT19	NALP3	RPMS11	HSPC235	RPMS11	MSTP035	RENOX	AUH	C16orf36	HADH
CGI-10	PRORP	TNRC6C	MT-CO2	AAG10	EPHX2	PYPAF1	HCC2	MRPL18	HCC2	ALDH4A1	NOX5	HIBCH	YISKL	HAD
COQ5	KIAA0391	KIAA1582	COII	CHCHD10	CRAT	NFKB1	MRPS15	HSPC071	MRPS15	ALDH4	PRDX5	BCAT1	NNT	HAD1
PDSS1	MRPP3	MOV10	COX2	C22orf16	CAT1	NFKB2	RPMS15	MRPL34	RPMS15	P5CDH	ACR1	BCT1	CS	HADHSC
DPS1	HSD17B10	KIAA1631	COXII	CHCHD3	PEX1	LYT10	DC37	MRPL38	DC37	GNMT	SBBI10	ECA39	SUCLG2	SCHAD
TPRT	ERAB	AGO2	MTCO2	MIC19	PEX6	RELA	MRPS33	HSPC262	MRPS33	AGXT2	TXN2	HIBADH	MDH2	ACADM
PDSS2	HADH2	EIF2C2	COX6A1	MINOS3	PXAAA1	NFKB3	CGI-139	MRPL1	CGI-139	AGT2	TRX2	BCAT2	ME2	MECR
C6orf210	MRPP2	AKT3	COX6AL	PMPCA	PEX26	HMOX1	PTD003	BM-022	PTD003	GOT2	CYCS	BCATM	FH	NBRF1
DLP1	SCHAD	PKBG	COX7C	INPP5E	ZFAND6	HO	PTCD3	OXA1L	PTCD3	KYAT4	CYC	BCT2	OGDH	CGI-63
COQ2	SDR5C1	AKT2	COX5B	KIAA0123	AWP1	HO1	MRPS39	MRPL32	MRPS39	LIAS	TXNRD2	ECA40	DLST	ECHS1
CL640	XH98G2	AKT1	COX4I1	MPPA	ZA20D3	PSTPIP1	TRG15	HSPC283	TRG15	LAS	KIAA1652	BCKDK	DLTS	HADHA
COQ3	TRMT61B	PKB	COX4	PMPCB	HT032	CD2BP1	MRPS16	MRPL15	MRPS16	HUSSY-01	TRXR2	DBT	DLD	HADH
UG0215E05	TRIT1	RAC	COX7A2L	MPPB	PEX5	MEFV	RPMS16	HSPC145	RPMS16	GCSH	ATP7A	BCATE2	GCSL	HADHB
COQ9	IPT	GLS	COX7AR	TOMM70	PXR1	MEF	CGI-132	MRPL40	CGI-132	AGXT	MC1	BCKDHB	LAD	MSTP029
C16orf49	MOD5	GLS1	COX7RP	KIAA0719	PEX7	TRIM20	MRPS2	NLVCF	MRPS2	AGT1	MNK	BCKDHA	PHE3	HADH
HSPC326	PUS1	KIAA0838	COX5A	TOM70	PTS2R	P2RX7	CGI-91	URIM	CGI-91	SPAT	ATOX1	DLD	IDH2	HAD
PSEC0129	PP8985	GLS2	COX7B	TOMM70A	AGPS	PANX1	MRPS12	MRPL14	MRPS12	LIPT2	HAH1	GCSL	SDHA	HAD1
COQ7	MTO1	GA	MT-CO1	TOMM22	AAG5	MRS1	RPMS12	MRPL32	RPMS12	NDUFAB1	NUDT2	LAD	SDH2	HADHSC
COQ6	CGI-02	SESN3	COI	TOM22	ACAA1	UNQ2529/PRO6028	RPSM12	RPML32	RPSM12	DLD	APAH1	PHE3	SDHF	SCHAD
CGI-10	GTPBP3	SEST3	COXI	TOMM20	ACAA	CASP1	MRPS6	MRPL16	MRPS6	GCSL	SOD2	ACAD8	SDHB	ACADM
COQ5	MTGP1	SESN2	MTCO1	KIAA0016	PTHIO	IL1BC	C21orf101	PNAS-111	C21orf101	LAD	AQP8	ARC42	SDH	MECR
PDSS1	TRMU	Hi95	MT-CO3	TOMM6	PHYH	IL1BCE	RPMS6	MRPL17	RPMS6	PHE3	GSR	IBD	SDH1	NBRF1
DPS1	MTU1	SEST2	COIII	OBTP	PAHX	NLRP3	MRPS10	LIP2	MRPS10	GLDC	GLUR	ALDH6A1	SDHD	CGI-63
TPRT	TRMT1	SESN1	COXIII	TOM6	PEX10	C1orf7	MSTP040	MRPL19	MSTP040	GCSP	GRD1	MMSDH	SDH4	ECHS1
PDSS2	TRMT10C	PA26	MTCO3	TOMM7	RNF69	CIAS1	MRPS7	KIAA0104	MRPS7	AMT	ERO1A	SLC25A44	SDHC	HADHA
C6orf210	MRPP1	SEST1	COX8A	TOM7	PEX2	NALP3	MRPS34	MRPL15	MRPS34	GCST	ERO1L	KIAA0446	CYB560	HADH
DLP1	RG9MTD1	SESN1	COX8	TOMM07	PAF1	PYPAF1	MRPS35	MRPL4	MRPS35	DAO	UNQ434/PRO865	ACADSB	SDH3	HADHB
COQ2	PRORP	PA26	COX8L	AD-014	PMP3	APP	MRPS28	CDABP0091	MRPS28	DAMOX	GPX8	MCCC2	SUCLA2	MSTP029
CL640	KIAA0391	SEST1	COX18	TOMM5	PMP35	A4	HDCMD11P	CGI-28	HDCMD11P	DDO	UNQ847/PRO1785	MCCB	SUCLG1	HADH
COQ3	MRPP3	COX6C	OXA1L2	C9orf105	PXMP3	AD1	MDS023	MRPL22	MDS023	LIPT1	GPX7	MCCC1	ME3	HAD
UG0215E05	HSD17B10	COX6B1	COX14	TOM5	RNF72	hly	PSEC0213	MRPL25	PSEC0213	BCKDHB	GPX6	MCCA	IDH3B	HAD1
COQ9	ERAB	COX6B	C12orf62	ATP5F1A	PEX12	hla	MRPS23	RPML25	MRPS23	BCKDHA	UNQ469/PRO828	HSD17B10	IDH3A	HADHSC
C16orf49	HADH2	NDUFA4	COX16	ATP5A	PAF3	SUGT1	CGI-138	HSPC158	CGI-138	DBT	P4HB	ERAB	IDH3G	SCHAD
HSPC326	MRPP2	MT-CO2	C14orf112	ATP5A1	PEX13	HSP90AB1	HSPC329	MRPL33	HSPC329	BCATE2	ERBA2L	HADH2	ACO2	ACADM
PSEC0129	SCHAD	COII	HSPC203	ATP5AL2	PEX14	HSP90B	MRPS5	C2orf1	MRPS5	DLST	PDI	MRPP2	FAHD1	MECR
COQ7	SDR5C1	COX2	PTD019	ATPM	UBC	HSPC2	MRPS17	MRPL48	MRPS17	DLTS	PDIA1	SCHAD	C16orf36	NBRF1
COQ6	XH98G2	COXII	COX20	CS	UBB	HSPCB	RPMS17	CGI-118	RPMS17	OGDH	PO4DB	SDR5C1	YISKL	CGI-63
CGI-10	TRMT61B	MTCO2	FAM36A	IDH3G	UBA52	PYCARD	HSPC011	HSPC290	HSPC011	DHTKD1	PRDX3	XH98G2	NNT	ECHS1
COQ5	TRIT1	COX6A1	COX11	CYC1	UBCEP2	ASC	MRPS36	MRPL2	MRPS36	KIAA1630	AOP1	PPM1K	CS	HADHA
PDSS1	IPT	COX6AL	COX19	BCS1L	RPS27A	CARD5	KGD4	CGI-22	KGD4	PDHB	CAT	PP2CM	SUCLG2	HADH
DPS1	MOD5	COX7C	SCO2	BCS1	UBA80	TMS1	DC47	MRPL51	DC47	PHE1B	GPX1	ECHS1	MDH2	HADHB
TPRT	PUS1	COX5B	TACO1	ACO2	UBCEP1	TXN	MRPS25	MRP64	MRPS25	PDHA2	SOD3	IVD	ME2	MSTP029
PDSS2	PP8985	COX4I1	CCDC44	TIMM8A	PEX5	TRDX	RPMS25	CDA09	RPMS25	PDHAL	SOD1	ACAT1	FH	HADH
C6orf210	MTO1	COX4	PRO0477	DDP	PXR1	TRX	MT-RNR1	HSPC241	MT-RNR1	PDHA1	CCS	ACAT	OGDH	HAD
DLP1	CGI-02	COX7A2L	SCO1	DDP1	USP9X	TRX1	AURKAIP1	MRPL54	AURKAIP1	PHE1A	NCF4	MAT	DLST	HAD1
COQ2	GTPBP3	COX7AR	SCOD1	TIM8A	DFFRX	TXNIP	AIP	MRPL27	AIP	PDHX	SH3PXD4	AUH	DLTS	HADHSC
CL640	MTGP1	COX7RP	SURF1	TIMM13	FAM	VDUP1	AKIP	HSPC250	AKIP	PDX1	NCF1	HIBCH	DLD	SCHAD
COQ3	TRMU	COX5A	SURF-1	TIM13B	USP9	NLRP3	MRPS38	MRPL52	MRPS38	DLAT	NOXO2	BCAT1	GCSL	ACADM
UG0215E05	MTU1	COX7B	LRPPRC	TIMM13A	UBE2D2	C1orf7	MRPS28	MRPL30	MRPS28	DLTA	SH3PXD1A	BCT1	LAD	MECR
COQ9	TRMT1	MT-CO1	LRP130	TIMM13B	PUBC1	CIAS1	MRPS35	MRPL28	MRPS35	PXMP2	NCF2	ECA39	PHE3	NBRF1
C16orf49	TRMT10C	COI	SDHA	TIMM8B	UBC4	NALP3	HSPC007	RPML28	HSPC007	PMP22	NOXA2	HIBADH	IDH2	CGI-63
HSPC326	MRPP1	COXI	SDH2	DDP2	UBC5B	PYPAF1	MRPS26	HSPC249	MRPS26	HOGA1	P67PHOX	BCAT2	SDHA	ECHS1
PSEC0129	RG9MTD1	MTCO1	SDHF	DDPL	UBCH4	NFKB1	C20orf193	MRPL10	C20orf193	C10orf65	CYBA	BCATM	SDH2	HADHA
COQ7	PRORP	MT-CO3	SDHB	TIM8B	UBCH5B	NFKB2	RPMS13	MRPL8	RPMS13	DHDPSL	CYBB	BCT2	SDHF	HADH
COQ6	KIAA0391	COIII	SDH	TOMM40	UBE2D1	LYT10	MRPS31	RPML8	MRPS31	HAO1	NOX2	ECA40	SDHB	HADHB
CGI-10	MRPP3	COXIII	SDH1	C19orf1	SFT	RELA	IMOGN38	MRPL43	IMOGN38	GOX1	GSR	BCKDK	SDH	MSTP029
COQ5	HSD17B10	MTCO3	SDHD	PEREC1	UBC5A	NFKB3	MRPS21	MRPL47	MRPS21	HAOX1	GLUR	DBT	SDH1	HADH
PDSS1	ERAB	COX8A	SDH4	TOM40	UBCH5	HMOX1	RPMS21	NCM1	RPMS21	PRODH2	GRD1	BCATE2	SDHD	HAD
DPS1	HADH2	COX8	SDHC	SLC25A12	UBCH5A	HO	MDS016	CGI-204	MDS016	HSPOX1	TXNRD1	BCKDHB	SDH4	HAD1
TPRT	MRPP2	COX8L	CYB560	ARALAR1	UBE2D3	HO1	MRPS9	MRPL50	MRPS9	HYPDH	GRIM12	BCKDHA	SDHC	HADHSC
PDSS2	SCHAD	CYCS	SDH3	SLC25A13	UBC5C	PSTPIP1	RPMS9	MRPL23	RPMS9	GRHPR	KDRF	DLD	CYB560	SCHAD
C6orf210	SDR5C1	CYC	TRAP1	ARALAR2	UBCH5C	CD2BP1	MRPS30	L23MRP	MRPS30	GLXR	TXN	GCSL	SDH3	ACADM
DLP1	XH98G2	COX18	HSP75	TIMM23	CAT	MEFV	PDCD9	RPL23L	PDCD9	MSTP035	TRDX	LAD	SUCLA2	MECR
COQ2	TRMT61B	OXA1L2	COQ10A	TIM23	TYSND1	MEF	BM-047	MRPL24	BM-047	ALDH4A1	TRX	PHE3	SUCLG1	NBRF1
CL640	TRIT1	COX14	UNQ6192/PRO20219	PITRM1	PIPOX	TRIM20	MRPS22	MRPL9	MRPS22	ALDH4	TRX1	ACAD8	ME3	CGI-63
COQ3	IPT	C12orf62	COQ10B	KIAA1104	LPIPOX	P2RX7	C3orf5	MRPL49	C3orf5	P5CDH	GPX2	ARC42	IDH3B	ECHS1
UG0215E05	MOD5	COX16	NDUFS5	MP1	PSO	PANX1	RPMS22	C11orf4	RPMS22	GNMT	PRDX5	IBD	IDH3A	HADHA
COQ9	PUS1	C14orf112	NDUFS6	PREP	NOS2	MRS1	GK002	NOF1	GK002	AGXT2	ACR1	ALDH6A1	IDH3G	HADH
C16orf49	PP8985	HSPC203	NDUFV1	COQ2	NOS2A	UNQ2529/PRO6028	MRPS14	OK/SW-cl.67	MRPS14	AGT2	SBBI10	MMSDH	ACO2	HADHB
HSPC326	MTO1	PTD019	UQOR1	CL640	ACOT2	CASP1	ERAL1	MRPL12	ERAL1	GOT2	PRDX1	SLC25A44	FAHD1	MSTP029
PSEC0129	CGI-02	COX20	NDUFV3	ATP5F1B	PTE2	IL1BC	HERA	RPML12	HERA	KYAT4	PAGA	KIAA0446	C16orf36	HADH
COQ7	GTPBP3	FAM36A	NDUFA12	ATP5B	PTE2A	IL1BCE	MRPS27	MRPL7	MRPS27	LIAS	PAGB	ACADSB	YISKL	HAD
COQ6	MTGP1	COX11	DAP13	ATPMB	DAO	NLRP3	KIAA0264	MT-RNR2	KIAA0264	LAS	TDPX2	MCCC2	NNT	HAD1
CGI-10	TRMU	COX19	NDUFS4	ATPSB	DAMOX	C1orf7	MRPS24	MRPL35	MRPS24	HUSSY-01	PRDX2	MCCB	CS	HADHSC
COQ5	MTU1	TACO1	NDUFS1	ATP5MC1	ACOX3	CIAS1	HSPC335	BM-007	HSPC335	GCSH	NKEFB	MCCC1	SUCLG2	SCHAD
PDSS1	TRMT1	CCDC44	NDUFV2	ATP5G1	BRCOX	NALP3	CHCHD1	MRPL58	CHCHD1	AGXT	TDPX1	MCCA	MDH2	ACADM
DPS1	TRMT10C	PRO0477	MT-ND4	LDHD	PRCOX	PYPAF1	C10orf34	DS1	C10orf34	AGT1	GPX6	HSD17B10	ME2	MECR
TPRT	MRPP1	SCO1	MTND4	NDUFB8	ACOX2	APP	MRPS37	ICT1	MRPS37	SPAT	GPX5	ERAB	FH	NBRF1
PDSS2	RG9MTD1	SCOD1	NADH4	HSCB	DECR2	A4	TUFM	MRPL42	MTRF1L	LIPT2	GSTP1	HADH2	OGDH	CGI-63
C6orf210	PRORP	SURF1	ND4	DNAJC20	PDCR	AD1	TSFM	MRPL31	MTRF1A	NDUFAB1	FAEES3	MRPP2	DLST	ECHS1
DLP1	KIAA0391	SURF-1	MT-ND5	HSC20	SDR17C1	hly	GFM1	MRPS32	MRRF	DLD	GST3	SCHAD	DLTS	HADHA
COQ2	MRPP3	LRPPRC	MTND5	HSPD1	ACOX1	hla	EFG	RPML31	GFM2	GCSL	PRDX6	SDR5C1	DLD	HADH
CL640	HSD17B10	LRP130	NADH5	HSP60	ACOX	SUGT1	EFG1	HSPC204	EFG2	LAD	AOP2	XH98G2	GCSL	HADHB
COQ3	ERAB	GPI	ND5	FXN	EHHADH	HSP90AB1	GFM	PTD007	MSTP027	PHE3	KIAA0106	PPM1K	LAD	MSTP029
UG0215E05	HADH2	GLS2	MT-ND1	FRDA	ECHD	HSP90B	MRPL41	MTFMT	MRPL41	GLDC	GPX3	PP2CM	PHE3	HADH
COQ9	MRPP2	GA	MTND1	X25	ACOT4	HSPC2	BMRP	FMT	BMRP	GCSP	GPXP	ECHS1	IDH2	HAD
C16orf49	SCHAD	GSR	NADH1	OTC	PTE2B	HSPCB	MRPL27	FMT1	MRPL27	AMT	NOX4	IVD	SDHA	HAD1
HSPC326	SDR5C1	GLUR	ND1	TIMM50	PTEIB	PYCARD	RPML27	MTIF3	RPML27	GCST	RENOX	ACAT1	SDH2	HADHSC
PSEC0129	XH98G2	GRD1	NDUFA9	TIM50	DHRS4	ASC	PIG3	DC38	PIG3	DAO	NOX5	ACAT	SDHF	SCHAD
